# Supplementary material
Source: PubMed Central journal article supplement (PMC5290210)
Supplement: NIHMS827012-supplement-1.pdf [file NIHMS827012-supplement-1.pdf]

## Supplementary Information

### RNAi targeting sequences

The RNAi targeting sequences used in this study were as follows:

$\alpha$ 3 integrin knockdown ( $\alpha$ 3-KD) cells, 5'-GGATGACTGTGAGCGGATGAA-3';

$\alpha$ 3-KD2 cells, 5'-CAACGAGATGTGCAATAGCAA-3' (ULTRA-3316429);

RhoA sh1, 5'-GTACATGGAGTGTTTCAGCAAA-3' (TRCN0000047710);

RhoA sh2, 5'-TGGAAAGACATGCTTGCTCAT-3' (TRCN0000047711);

RhoA sh3, 5'-GAAAGCAGGTAGAGTTGGCTT-3' (TRCN0000047712);

RhoC sh1, 5'-TGATGTCATCCTCATGTGCTT-3' (TRCN0000291516);

RhoC sh2, 5'-CTACTGTCTTTGAGAACTATA'-3' (TRCN0000047864);

LATS sh1, 5'-TATTCCTCAGTCTATGATGGT'-3';

LATS sh2, 5'-TTCCTGTTGGCAGACAACCAA-3';

LATS sh3, 5'-TTAACCGCAAACAGAGCTGGA-3';

LATS sh4, 5'-TACGAGTCAATCAGTAAGCCT-3';

LATS sh5, 5'-GAAGATAAAGACACTAGGAAT-3' (TRCN0000001776);

LATS sh6, 5'-CACGGCAAGATAGCATGGATT-3' (TRCN0000001777);

shYAP, 5'-CTGGTCAGAGATACTTCTTAA-3';

YAP sh1, 5'-ATACCTGATGATGTACCTCTG-3';

YAP sh2, 5'-ACAGGTGATACTATCAACCAA-3';

shTAZ, 5'-TGTCATGAATCCGAAGCCTAG-3';

TAZ sh1, 5'-TCCGGAGGACTTCCTCAGCAA-3' (ULTRA-3266816);

TAZ sh2, 5'-CACATAGAAAAATCACCACA-3' (ULTRA-3266817);

TAZ sh3 5'-CCGGAGGACTTCCTCAGCAAT-3' (ULTRA-3266819);

Arg sh1, 5'-GTCCTTATCTCACCCACTC-3';

Arg sh2, 5'-CCTCAAACCTCGCAACAAAT-3';

Abl sh1, 5-CCAGGTGTATGAGCTGCTAGA-3' (ULTRA-3267082);

Abl sh2, 5'-CAGGATCAACACTGCTTCTGA-3' (ULTRA-3267083);

Abl sh3, 5'-GCAGTCATGAAAGAGATCAAA-3' (ULTRA-3267084).

### Supplementary Figure Legends

**Figure S1. Stable silencing of  $\alpha 3$  integrin in GS689.Li cells.** RNAi silencing of  $\alpha 3$  integrin in GS689.Li prostate cancer cells was evaluated by flow cytometry. The geometric mean fluorescence of  $\alpha 3$  integrin staining was reduced by ~90% in the  $\alpha 3$ -KD cells.

**Figure S2. Dissemination of  $\alpha 3$ -KD and NT control cells adjusted for primary tumor burden.** (A) The apparent primary tumor burden in each mouse at the time of sacrifice was measured by drawing a region of interest over the site of tumor implantation and quantifying the total photon flux. Data are plotted as log photon flux. There was a trend towards higher tumor burden in the mice harboring the  $\alpha 3$ -KD prostate cancer cells, but the difference was not statistically significant. (B) Lung colonization data ( $\mu\text{m}^2$  of area occupied by GFP-labeled cells) was normalized for the total primary tumor burden as measured by BLI. The  $\alpha 3$ -KD cell metastasis to lung was significantly greater than NT control cell metastasis,  $P=0.0493$ , unpaired t test. (C) Liver colonization (% area of liver surface occupied by GFP-labeled prostate cancer cells) was normalized to primary tumor burden. The  $\alpha 3$ -KD cells showed significantly more colonization,  $P=0.023$ , unpaired t test. (D) Kidney colonization (% area of kidney surface occupied by GFP-labeled prostate cancer cells) was normalized to primary tumor burden. The  $\alpha 3$ -KD cells showed a trend towards greater colonization, but the difference did not rise to statistical significance.

**Figure S3. Silencing  $\alpha 3$  integrin in multiple contexts promotes prostate carcinoma cell growth in 3D matrix.** (A) An independent  $\alpha 3$  integrin RNAi vector ( $\alpha 3$ -KD2) strongly blocked  $\alpha 3$  integrin expression. *Top panel:*  $\alpha 3$  integrin was immunoprecipitated from detergent extracts of NT control and  $\alpha 3$ -KD2 cells that had been cell surface labeled with biotin. *Middle panel:* total  $\alpha 3$  integrin expression was measured by immunoblotting lysates of NT control and  $\alpha 3$ -KD cells. *Lower panel:* actin loading control. Numbers below each lane indicate intensity values obtained from a LiCOR blot imager. (B) The  $\alpha 3$ -KD2 cells showed significantly increased growth in 3D \*P<0.0001, unpaired t test. (C) RNAi silencing of  $\alpha 3$  integrin using the  $\alpha 3$ -KD construct in DU-145 prostate cancer cells was evaluated by flow cytometry. The geometric mean fluorescence of  $\alpha 3$  integrin staining was reduced by ~89% in the  $\alpha 3$ -KD DU-145 cells. (D) The  $\alpha 3$ -KD DU-145 cells also displayed significantly increased growth in 3D, compared to the NT control cells \*P<0.0001, unpaired t test.

**Figure S4. The  $\alpha 3$ -KD cells display increased contractility, which contributes to growth under low growth factor and low anchorage conditions.** (A) The  $\alpha 3$ -KD cells displayed a more profound contractile response to serum refeed after overnight serum starvation. (B) Quantification of spread cell area after serum refeed. \*P=0.005, P=0.001, P=0.00004, P=0.0001, P=0.0001, and P=0.00003 at 5-10 minutes post-serum refeed, respectively, Holm-Sidak's multiple comparison test,  $\alpha$ =0.05. Error bars,  $\pm$  SEM, n=10. The myosin II inhibitor, blebbistatin, drove down the growth of  $\alpha 3$ -KD cells under serum starvation conditions in 2D cultures (C) or on 3D collagen (D); P values are from 2 way ANOVA with Tukey's multiple comparison test.

**Figure S5. Increased TAZ expression in  $\alpha 3$ -KD DU-145 cells growing in suspension.** DU145 NT control cells and  $\alpha 3$ -KD cells were cultured in suspension over non-adherent poly-HEMA for 4 days, lysed and immunoblotted for TAZ protein. TAZ protein levels were increased

in the  $\alpha$ 3-KD DU-145 cells, similar to the  $\alpha$ 3-KD GS689.Li prostate carcinoma cells. Actin loading controls are shown in the lower panel. Numbers below each lane indicate intensity units obtained with a LiCOR blot imager.

**Figure S6. Increased RhoA activity and YAP and TAZ expression in  $\alpha$ 3-KD GS689.Li cells**

**growing in suspension.**  $\alpha$ 3-KD and NT control cells were grown for 3 days under detached conditions over poly-HEMA, as described in Materials and Methods. **(A)** Cell lysates were prepared from 3 biological replicates per cell type and used for Rhotekin-GST pulldown assays to measure active (GTP-loaded) RhoA and RhoC, or blotted for total RhoA, RhoC, YAP, TAZ, or tubulin. **(B-I)** Quantification of the blot shown in **(A)** using a LiCOR blot imager. Values in **B, C,** and **F-I** are normalized based on the tubulin loading control. Values in **D** and **E** are expressed as a ratio of active/total RhoA or RhoC. GTP-RhoA, YAP, and TAZ were all increased in  $\alpha$ 3-KD cells compared to NT control cells. P values from unpaired t test.

**Figure S7. Silencing TAZ but not YAP with multiple independent constructs blocks the**

**growth of  $\alpha$ 3-KD cells.** **(A)** Evaluation of YAP and TAZ protein expression levels in  $\alpha$ 3-KD cells transduced with a non-targeting (NT) control construct or with one of three different TAZ shRNA constructs. TAZ expression was reduced by 88-90% in TAZsh1 and TAZsh2 cells, and by 62% in TAZsh3 cells. Lower panel shows actin loading controls. Numbers below each lane indicate intensity units from a LiCOR blot imager. **(B)** The  $\alpha$ 3-KD cells depleted for TAZ all showed significantly reduced 3D growth compared to the NT control cells, \*\*\*P<0.0001, ANOVA with Tukey post-test. In addition, TAZsh3 cells, which retained somewhat more TAZ expression, showed a modest but significant increase in 3D growth compared to TAZsh1 and TAZsh2, P=0.0015 and 0.0008 respectively, ANOVA with Tukey post-test. **(C)** Evaluation of YAP protein expression in  $\alpha$ 3-KD cells transduced with a non-targeting (NT) control construct or with one of

two different TAZ shRNA constructs. YAP expression was reduced by 77% and 83% in YAPsh1 and YAPsh2 cells respectively. **(D)** Neither YAP shRNA construct reduced 3D growth; instead, each construct appeared to moderately increase growth.

**Figure S8. Involvement of LATS1 in suppression of 3D growth mediated by  $\alpha$ 3 integrin.**

**(A&B)** The LATS1 sh4 construct reduced LATS1 expression by ~90%, and potently promoted the growth of the cells in 3D collagen,  $P < 0.0001$ , ANOVA with Tukey's post test. **(C&D)** Force-expressing LATS1 in  $\alpha$ 3-KD cells increased LATS1 protein levels by ~87% and suppressed 3D growth;  $P = 0.0023$ , unpaired t test. **(E&F)** The LATS sh5 construct reduced LATS1 expression by ~67% and moderately increased 3D growth compared to non-targeting vector control (VEC) or the inactive LATS sh6 construct, P values from ANOVA with Tukey's post test.

**Figure S9. p190RhoGAP activation state is reduced in  $\alpha$ 3-KD cells growing in suspension.**

NT control and  $\alpha$ 3-KD cells were grown in suspension over non-adherent poly-HEMA in serum-free medium with 5  $\mu$ M LPA for 4 days. **(A)** Cell lysates were prepared and p190RhoGAP was immunoprecipitated, followed by blotting for (i) phospho-tyrosine to detect phosphorylated, activated p190 (upper panel), (ii) p120RasGAP to detect the p190/p120 complex (middle panel), or (iii) total p190RhoGAP as a loading control (lower panel). The amount of phosphorylated, p120-associated p190 was reduced in the  $\alpha$ 3-KD cells. **(B)** Blotting for phospho-Crk/CrkL (upper panel) or total Crk (lower panel). The amount of phospho-Crk/CrkL was reduced in the  $\alpha$ 3-KD cells, providing further evidence of reduced activity of Abl family kinase activity. Numbers below each lane in A and B are from a LiCOR blot imager.

**Figure S10. FAK activation is increased in  $\alpha$ 3-KD cells growing under detached**

**conditions, but a FAK inhibitor does not block 3D growth. (A)** NT control and  $\alpha$ 3-KD cells

were grown for 4 days under detached conditions, as described in Materials and Methods and cell lysates were blotted for phospho-FAK (Y397), total FAK, or actin. **(B)** Dose-response effect of FAK inhibitor PF-573228 on growth in 3D collagen.

**Figure S11. Quartile scoring system for the prostate cancer tissue microarray. (A)**

Representative images of the quartile scoring system developed for  $\alpha 3$  integrin, and nuclear TAZ and YAP (see Materials and Methods for details). (Note: proliferative basal cells in benign glands are TAZ and YAP positive). **(B)** The anti- $\alpha 3$  integrin, anti-TAZ, and anti-YAP antibodies used for IHC analysis each recognized a major band of the appropriate size in immunoblots of GS689.Li control cell lysates that was absent in the respective  $\alpha 3$ , TAZ, or YAP-silenced GS689.Li cell lysates.

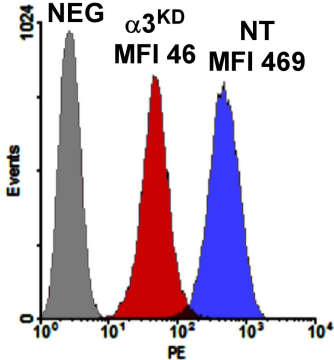

**Figure S1**

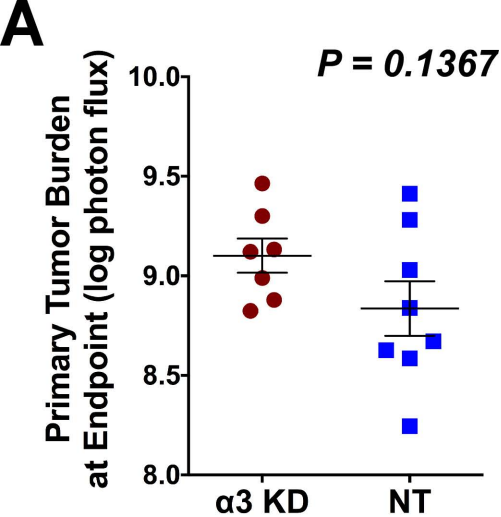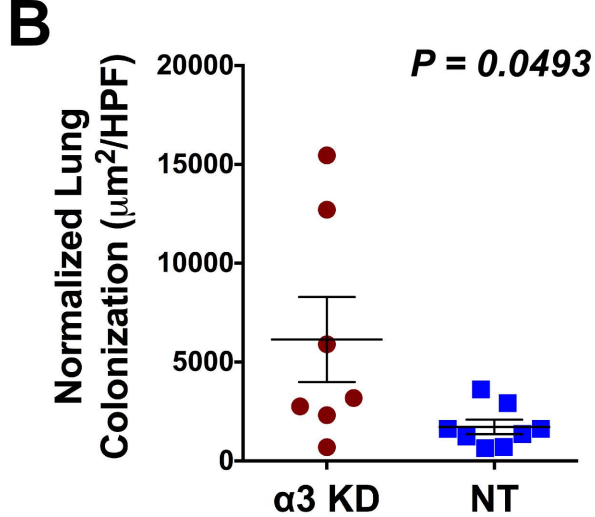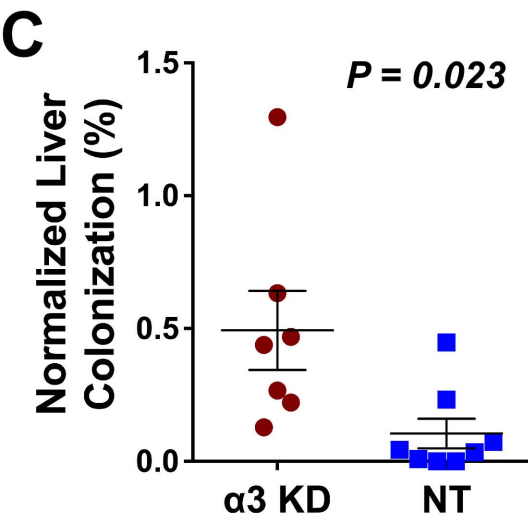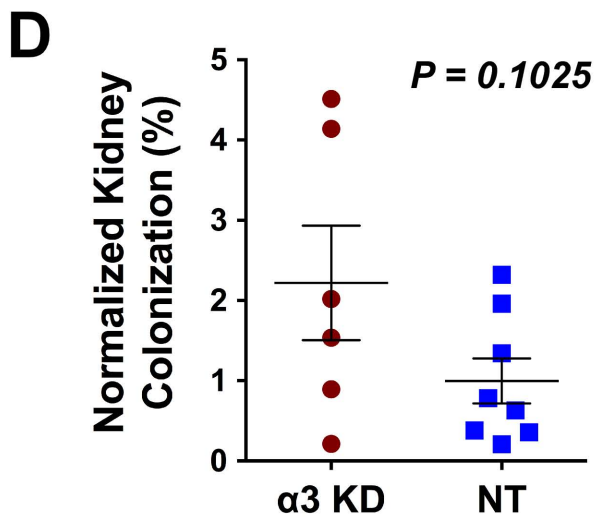

Figure S2



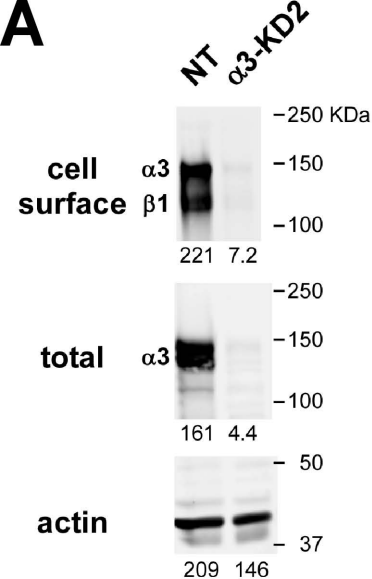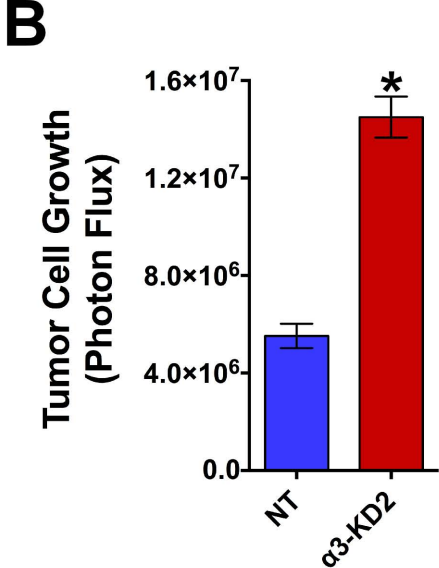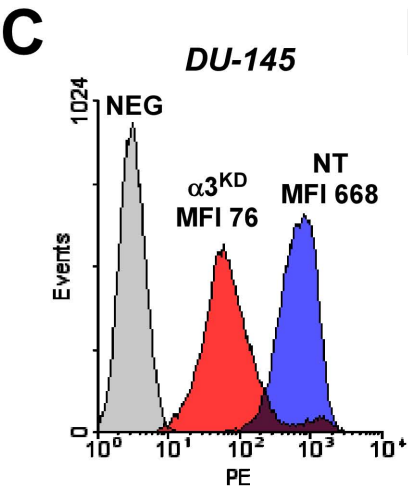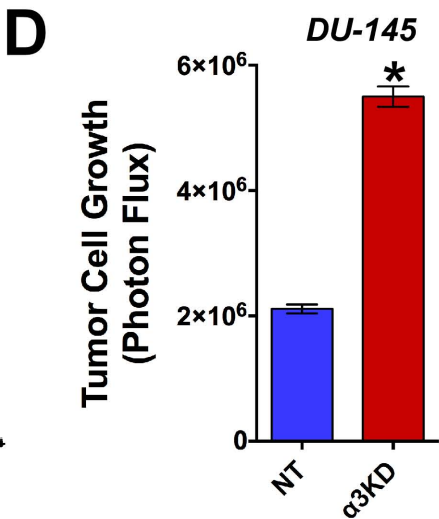

Figure S3

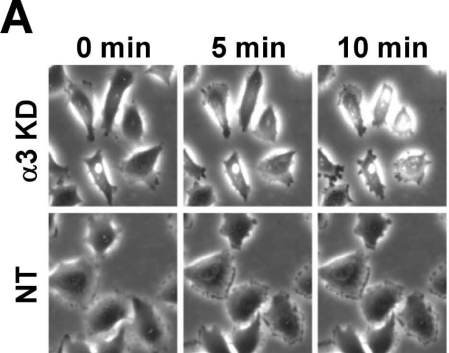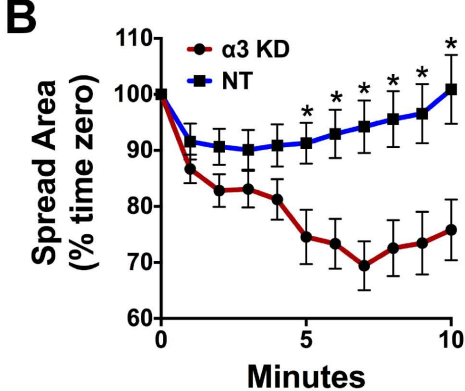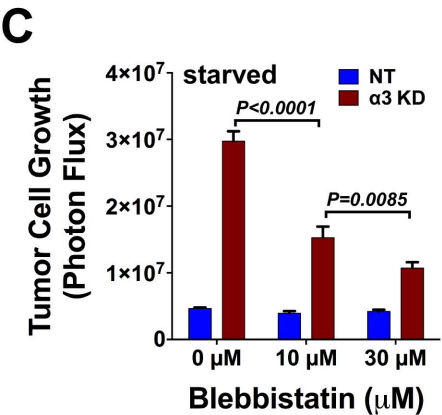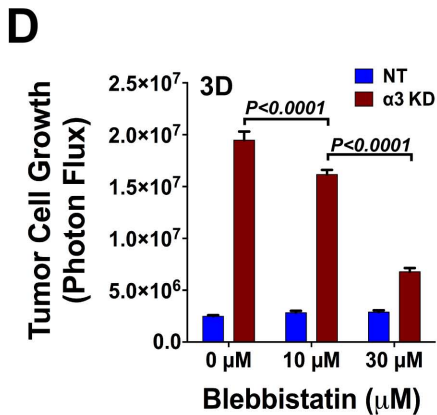

Figure S4

**NT**

**$\alpha 3$  KD**

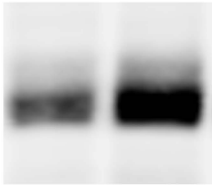

**TAZ**

**56**

**119**

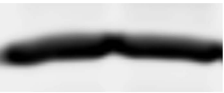

**actin**

**494**

**474**

**Figure S5**

**A**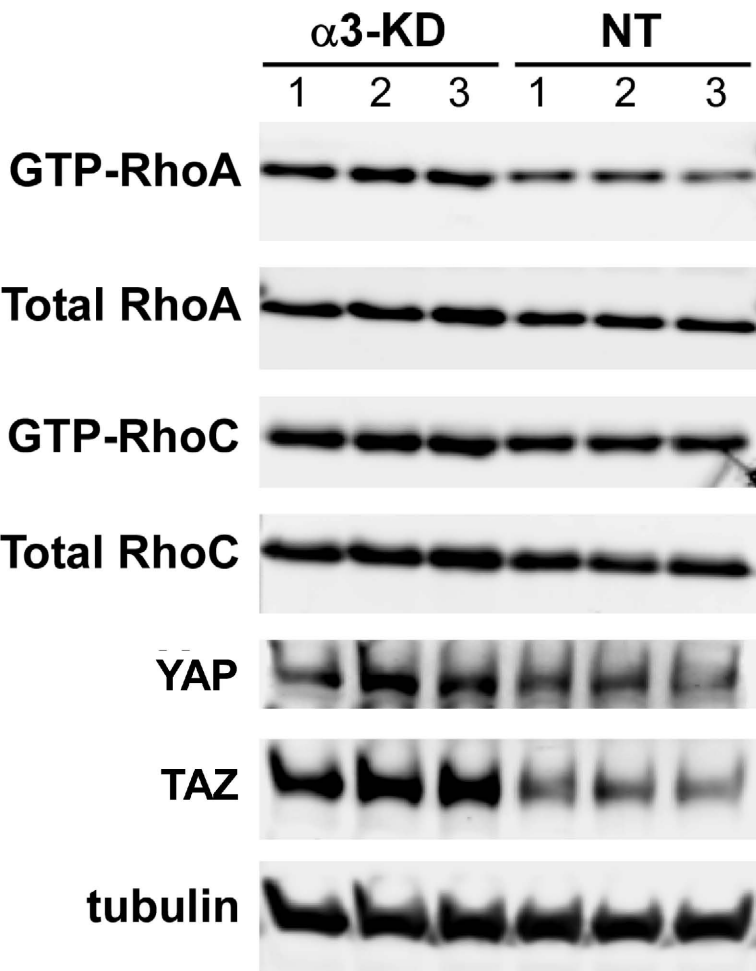**B**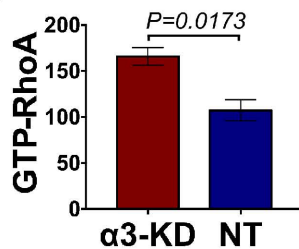**C**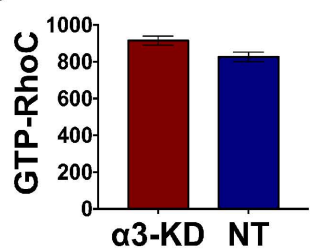**D**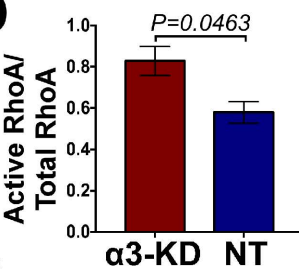**E**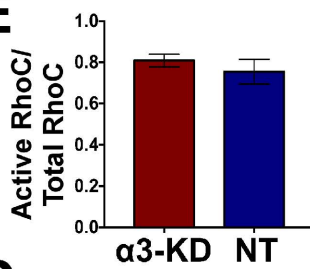**F**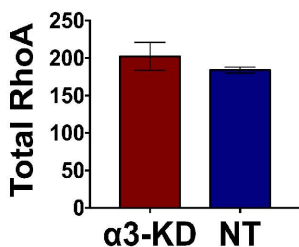**G**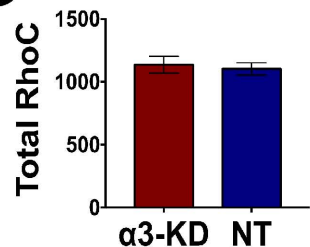**H**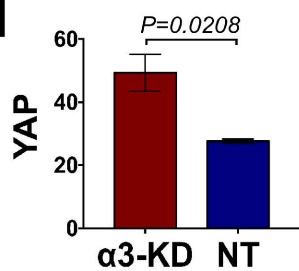**I**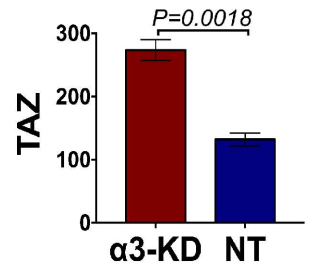

Figure S6

**A**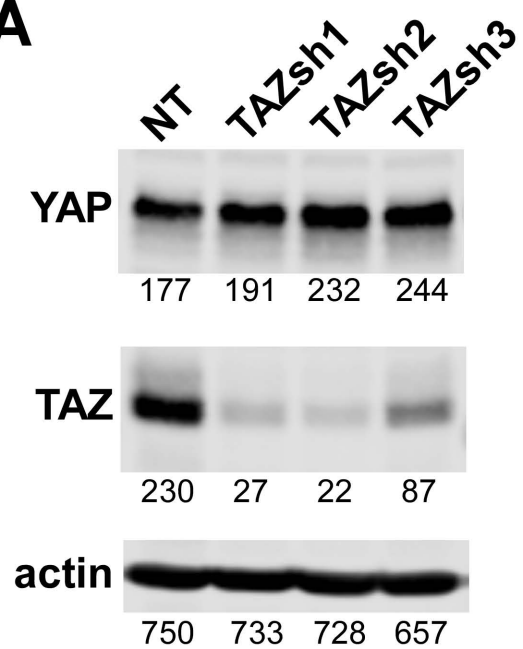**B**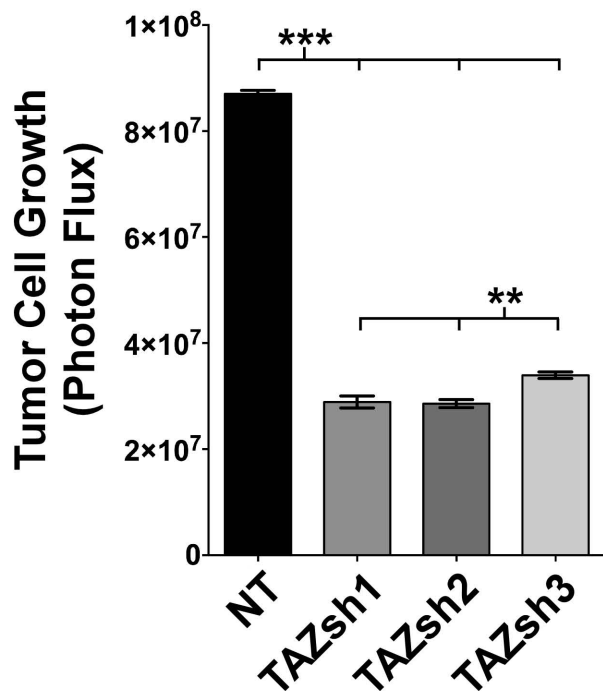**C**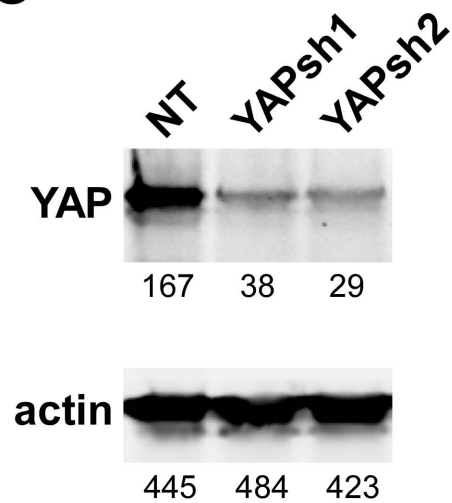**D**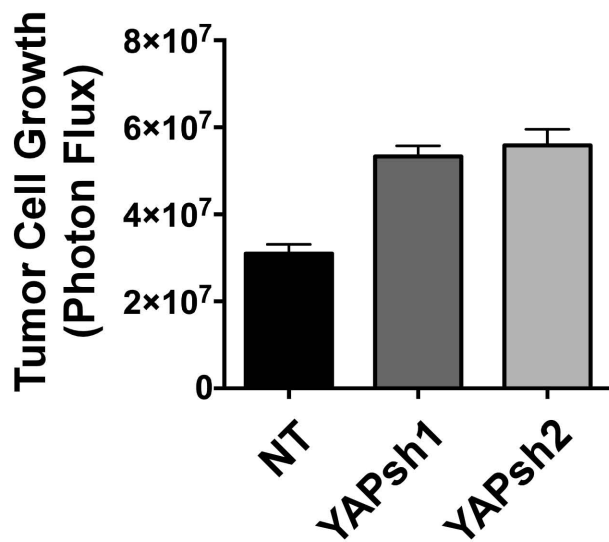

Figure S7

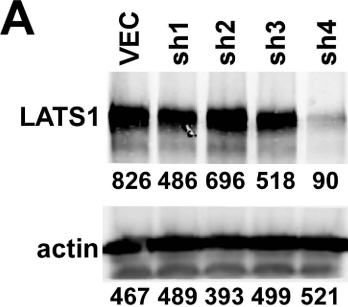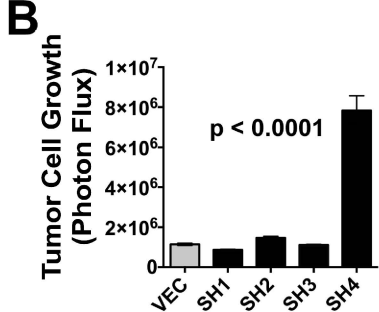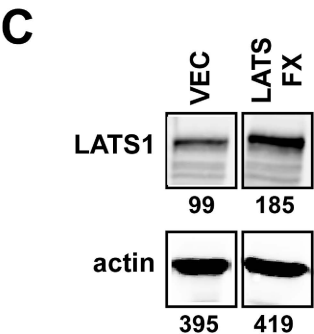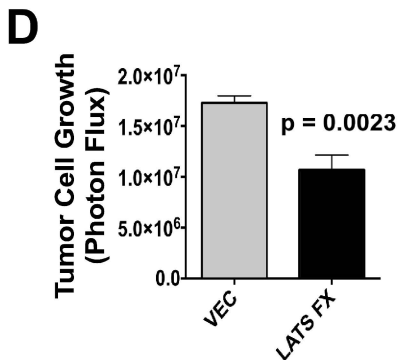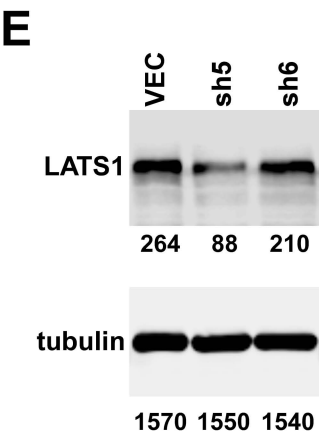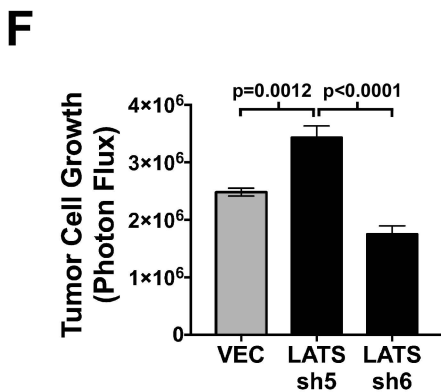

**Figure S8**

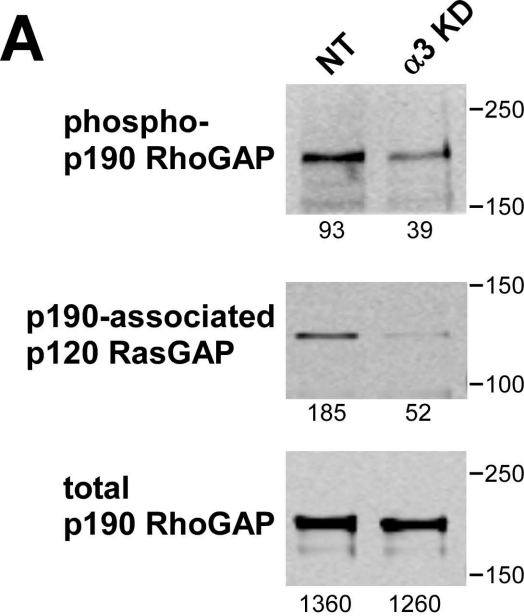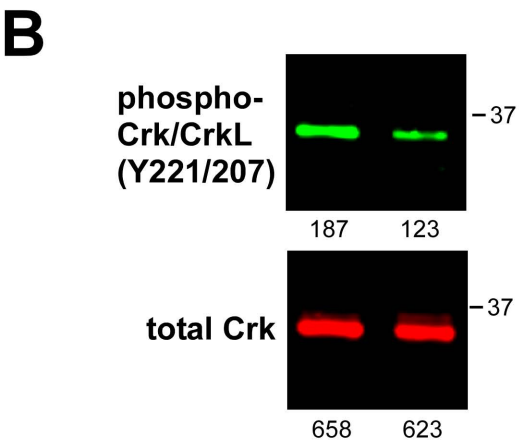

**Figure S9**

**A**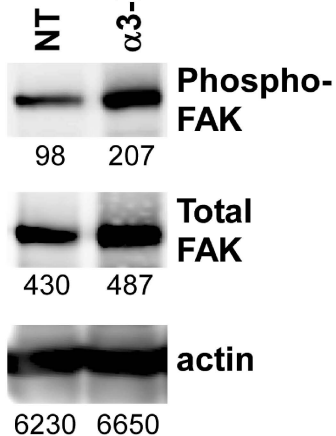**B**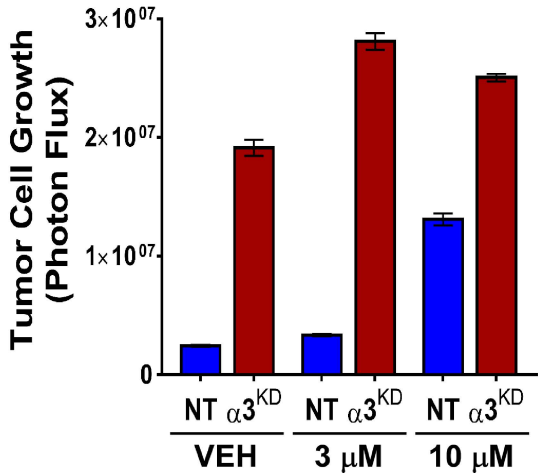**Figure S10**



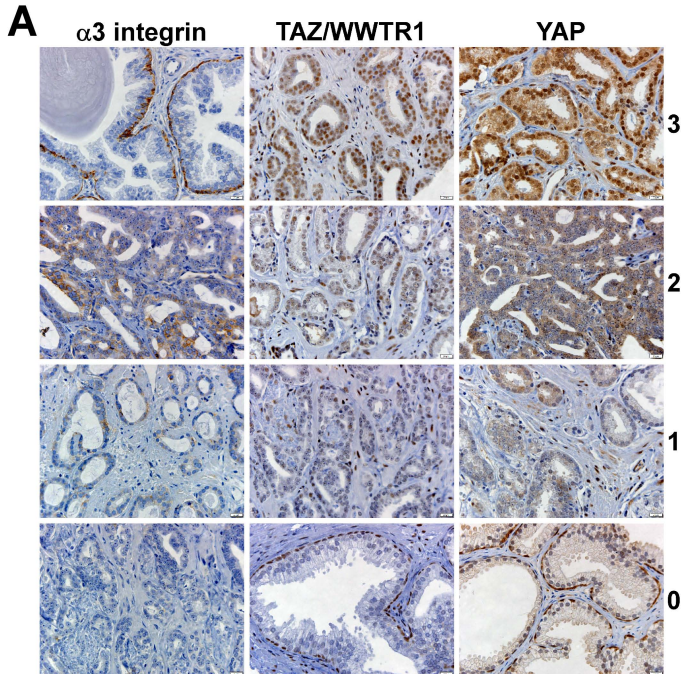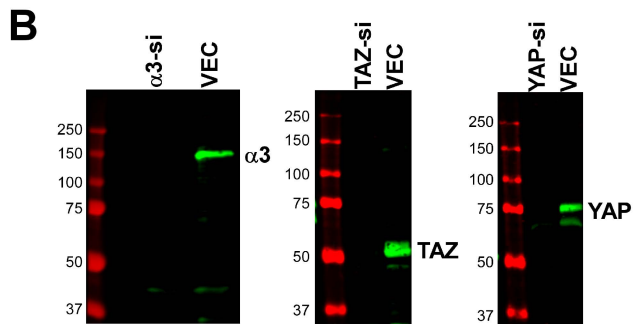

Figure S11
